# Supplementary material
Source: publisher figshare collection journal article supplement (https://springernature.figshare.com/ndownloader/files/24464993)
Supplement: Supplementary file 1 [file 24464993]

Measurement(s),economic cost of biological invasions
Technology Type(s),digital curation
Sample Characteristic - Environment,aquatic environment • terrestrial biome • semi-aquatic environment
Sample Characteristic - Location,Earth (planet)
